# Supplementary material
Source: Elsevier journal article supplement (https://www.sciencedirect.com/science/article/pii/S2530064419300173)
Supplement: mmc1 [file S2530064419300173:mmc1.doc]

SUPPORTING INFORMATION

*A global endemics-area relationship of vascular plants*

Carsten Hobohm, Monika Janišová, Manuel Steinbauer, Sara Landi, Richard Field, Sula Vanderplank, Carl Beierkuhnlein, John-Arvid Grytnes, Ole Reidar Vetaas, Alessandra Fidelis, Lea de Nascimento, Vincent Ralph Clark, José María Fernández-Palacios, Scott Franklin, Riccardo Guarino, Jihong Huang, Pavel Krestov, Keping Ma, Vladimir Onipchenko, Mike W. Palmer, Marcelo Fragomeni Simon, Christian Stolz, Alessandro Chiarucci2

Appendix S1. Sectors, geographical points, and estimates of the number of endemic vascular plant species per circular plot. All minima and maxima are representing the median of five estimates.

| Northern hemisphere | |  | Centre |  | Median |  |
| --- | --- | --- | --- | --- | --- | --- |
| Sector | Longitude | Latitude | (land or sea) | A (km2) | E min | E max |
| 1 | 53 | 1 | sea | 100000000 | 69000 | 90000 |
| 1 | 53 | 1 |  | 10000000 | 600 | 1056 |
| 1 | 53 | 1 |  | 1000000 | 0 | 0 |
| 1 | 53 | 1 |  | 100000 | 0 | 0 |
| 1 | 53 | 1 |  | 10000 | 0 | 0 |
| 1 | 15 | 25 | land | 100000000 | 38000 | 54000 |
| 1 | 15 | 25 |  | 10000000 | 100 | 600 |
| 1 | 15 | 25 |  | 1000000 | 17 | 19 |
| 1 | 15 | 25 |  | 100000 | 5 | 9 |
| 1 | 15 | 25 |  | 10000 | 0 | 3 |
| 1 | 18 | 43 | land | 100000000 | 30000 | 35000 |
| 1 | 18 | 43 |  | 10000000 | 3700 | 4500 |
| 1 | 18 | 43 |  | 1000000 | 380 | 490 |
| 1 | 18 | 43 |  | 100000 | 50 | 150 |
| 1 | 18 | 43 |  | 10000 | 10 | 50 |
| 1 | 9 | 54 | land | 100000000 | 16000 | 27000 |
| 1 | 9 | 54 |  | 10000000 | 650 | 850 |
| 1 | 9 | 54 |  | 1000000 | 5 | 20 |
| 1 | 9 | 54 |  | 100000 | 1 | 5 |
| 1 | 9 | 54 |  | 10000 | 1 | 3 |
| 1 | 29 | 57 | land | 100000000 | 21000 | 28000 |
| 1 | 29 | 57 |  | 10000000 | 400 | 1000 |
| 1 | 29 | 57 |  | 1000000 | 5 | 20 |
| 1 | 29 | 57 |  | 100000 | 0 | 3 |
| 1 | 29 | 57 |  | 10000 | 0 | 1 |
| 2 | 86 | 2 | sea | 100000000 | 70000 | 100000 |
| 2 | 86 | 2 |  | 10000000 | 1800 | 3200 |
| 2 | 86 | 2 |  | 1000000 | 0 | 0 |
| 2 | 86 | 2 |  | 100000 | 0 | 0 |
| 2 | 86 | 2 |  | 10000 | 0 | 0 |
| 2 | 69 | 21 | sea | 100000000 | 68512 | 89580 |
| 2 | 69 | 21 |  | 10000000 | 2500 | 3500 |
| 2 | 69 | 21 |  | 1000000 | 50 | 500 |
| 2 | 69 | 21 |  | 100000 | 1 | 20 |
| 2 | 69 | 21 |  | 10000 | 0 | 0 |
| 2 | 81 | 26 | land | 100000000 | 71512 | 92000 |
| 2 | 81 | 26 |  | 10000000 | 4870 | 8700 |
| 2 | 81 | 26 |  | 1000000 | 500 | 2400 |
| 2 | 81 | 26 |  | 100000 | 5 | 60 |
| 2 | 81 | 26 |  | 10000 | 0 | 5 |
| 2 | 113 | 57 | land | 100000000 | 20000 | 35000 |
| 2 | 113 | 57 |  | 10000000 | 50 | 300 |
| 2 | 113 | 57 |  | 1000000 | 5 | 30 |
| 2 | 113 | 57 |  | 100000 | 0 | 3 |
| 2 | 113 | 57 |  | 10000 | 0 | 1 |
| 2 | 111 | 86 | sea | 100000000 | 5500 | 13000 |
| 2 | 111 | 86 |  | 10000000 | 2 | 10 |
| 2 | 111 | 86 |  | 1000000 | 0 | 0 |
| 2 | 111 | 86 |  | 100000 | 0 | 0 |
| 2 | 111 | 86 |  | 10000 | 0 | 0 |
| 3 | 123 | 4 | sea | 100000000 | 60000 | 115000 |
| 3 | 123 | 4 |  | 10000000 | 10000 | 16000 |
| 3 | 123 | 4 |  | 1000000 | 200 | 1000 |
| 3 | 123 | 4 |  | 100000 | 0 | 0 |
| 3 | 123 | 4 |  | 10000 | 0 | 0 |
| 3 | 127 | 17 | sea | 100000000 | 70000 | 110000 |
| 3 | 127 | 17 |  | 10000000 | 2000 | 3500 |
| 3 | 127 | 17 |  | 1000000 | 5 | 100 |
| 3 | 127 | 17 |  | 100000 | 0 | 0 |
| 3 | 127 | 17 |  | 10000 | 0 | 0 |
| 3 | 145 | 18 | sea | 100000000 | 50000 | 90000 |
| 3 | 145 | 18 |  | 10000000 | 50 | 200 |
| 3 | 145 | 18 |  | 1000000 | 33 | 80 |
| 3 | 145 | 18 |  | 100000 | 5 | 20 |
| 3 | 145 | 18 |  | 10000 | 0 | 0 |
| 3 | 165 | 55 | sea | 100000000 | 8000 | 28000 |
| 3 | 165 | 55 |  | 10000000 | 20 | 100 |
| 3 | 165 | 55 |  | 1000000 | 8 | 20 |
| 3 | 165 | 55 |  | 100000 | 0 | 2 |
| 3 | 165 | 55 |  | 10000 | 0 | 0 |
| 3 | 133 | 58 | land | 100000000 | 20000 | 40000 |
| 3 | 133 | 58 |  | 10000000 | 15 | 100 |
| 3 | 133 | 58 |  | 1000000 | 0 | 20 |
| 3 | 133 | 58 |  | 100000 | 0 | 2 |
| 3 | 133 | 58 |  | 10000 | 0 | 2 |
| 4 | -53 | 0 | land | 100000000 | 76000 | 115000 |
| 4 | -53 | 0 |  | 10000000 | 5000 | 15000 |
| 4 | -53 | 0 |  | 1000000 | 2000 | 5000 |
| 4 | -53 | 0 |  | 100000 | 250 | 500 |
| 4 | -53 | 0 |  | 10000 | 20 | 50 |
| 4 | -16 | 4 | sea | 100000000 | 50000 | 85000 |
| 4 | -16 | 4 |  | 10000000 | 300 | 600 |
| 4 | -16 | 4 |  | 1000000 | 0 | 0 |
| 4 | -16 | 4 |  | 100000 | 0 | 0 |
| 4 | -16 | 4 |  | 10000 | 0 | 0 |
| 4 | -59 | 13 | sea | 100000000 | 77000 | 113500 |
| 4 | -59 | 13 |  | 10000000 | 8500 | 12000 |
| 4 | -59 | 13 |  | 1000000 | 350 | 900 |
| 4 | -59 | 13 |  | 100000 | 3 | 5 |
| 4 | -59 | 13 |  | 10000 | 0 | 2 |
| 4 | -23 | 22 | sea | 100000000 | 35200 | 68000 |
| 4 | -23 | 22 |  | 10000000 | 620 | 800 |
| 4 | -23 | 22 |  | 1000000 | 0 | 0 |
| 4 | -23 | 22 |  | 100000 | 0 | 0 |
| 4 | -23 | 22 |  | 10000 | 0 | 0 |
| 4 | -12 | 36 | sea | 100000000 | 27500 | 47000 |
| 4 | -12 | 36 |  | 10000000 | 2500 | 3700 |
| 4 | -12 | 36 |  | 1000000 | 130 | 300 |
| 4 | -12 | 36 |  | 100000 | 0 | 0 |
| 4 | -12 | 36 |  | 10000 | 0 | 0 |
| 5 | -69 | 12 | sea | 100000000 | 80000 | 120000 |
| 5 | -69 | 12 |  | 10000000 | 21500 | 40000 |
| 5 | -69 | 12 |  | 1000000 | 700 | 2000 |
| 5 | -69 | 12 |  | 100000 | 20 | 750 |
| 5 | -69 | 12 |  | 10000 | 5 | 10 |
| 5 | -82 | 30 | land | 100000000 | 54850 | 100000 |
| 5 | -82 | 30 |  | 10000000 | 2500 | 4000 |
| 5 | -82 | 30 |  | 1000000 | 208 | 500 |
| 5 | -82 | 30 |  | 100000 | 30 | 190 |
| 5 | -82 | 30 |  | 10000 | 0 | 15 |
| 5 | -73 | 40 | sea | 100000000 | 40000 | 70000 |
| 5 | -73 | 40 |  | 10000000 | 120 | 300 |
| 5 | -73 | 40 |  | 1000000 | 15 | 55 |
| 5 | -73 | 40 |  | 100000 | 0 | 6 |
| 5 | -73 | 40 |  | 10000 | 0 | 0 |
| 5 | -90 | 44 | land | 100000000 | 30000 | 59720 |
| 5 | -90 | 44 |  | 10000000 | 40 | 100 |
| 5 | -90 | 44 |  | 1000000 | 5 | 20 |
| 5 | -90 | 44 |  | 100000 | 0 | 2 |
| 5 | -90 | 44 |  | 10000 | 0 | 0 |
| 5 | -93 | 65 | land | 100000000 | 8000 | 20000 |
| 5 | -93 | 65 |  | 10000000 | 10 | 50 |
| 5 | -93 | 65 |  | 1000000 | 0 | 10 |
| 5 | -93 | 65 |  | 100000 | 0 | 2 |
| 5 | -93 | 65 |  | 10000 | 0 | 0 |
| 6 | -167 | 8 | sea | 100000000 | 6000 | 10000 |
| 6 | -167 | 8 |  | 10000000 | 0 | 12 |
| 6 | -167 | 8 |  | 1000000 | 0 | 0 |
| 6 | -167 | 8 |  | 100000 | 0 | 0 |
| 6 | -167 | 8 |  | 10000 | 0 | 0 |
| 6 | -124 | 24 | sea | 100000000 | 22700 | 35000 |
| 6 | -124 | 24 |  | 10000000 | 300 | 1000 |
| 6 | -124 | 24 |  | 1000000 | 0 | 0 |
| 6 | -124 | 24 |  | 100000 | 0 | 0 |
| 6 | -124 | 24 |  | 10000 | 0 | 0 |
| 6 | -165 | 28 | sea | 100000000 | 4200 | 9000 |
| 6 | -165 | 28 |  | 10000000 | 600 | 1000 |
| 6 | -165 | 28 |  | 1000000 | 0 | 0 |
| 6 | -165 | 28 |  | 100000 | 0 | 0 |
| 6 | -165 | 28 |  | 10000 | 0 | 0 |
| 6 | -165 | 48 | sea | 100000000 | 7000 | 12000 |
| 6 | -165 | 48 |  | 10000000 | 7 | 63 |
| 6 | -165 | 48 |  | 1000000 | 0 | 0 |
| 6 | -165 | 48 |  | 100000 | 0 | 0 |
| 6 | -165 | 48 |  | 10000 | 0 | 0 |
| 6 | -162 | 63 | land | 100000000 | 4000 | 9000 |
| 6 | -162 | 63 |  | 10000000 | 20 | 200 |
| 6 | -162 | 63 |  | 1000000 | 0 | 10 |
| 6 | -162 | 63 |  | 100000 | 0 | 2 |
| 6 | -162 | 63 |  | 10000 | 0 | 1 |
| Southern hemisphere | | | Centre |  | Median |  |
| Sector | Longitude | Latitude | (land or sea) | A (km2) | E min | E max |
| 7 | 47 | -3 | sea | 100000000 | 60000 | 75000 |
| 7 | 47 | -3 |  | 10000000 | 1150 | 2550 |
| 7 | 47 | -3 |  | 1000000 | 0 | 0 |
| 7 | 47 | -3 |  | 100000 | 0 | 0 |
| 7 | 47 | -3 |  | 10000 | 0 | 0 |
| 7 | 16 | -5 | land | 100000000 | 55000 | 70000 |
| 7 | 16 | -5 |  | 10000000 | 5300 | 9800 |
| 7 | 16 | -5 |  | 1000000 | 2500 | 3000 |
| 7 | 16 | -5 |  | 100000 | 400 | 800 |
| 7 | 16 | -5 |  | 10000 | 5 | 220 |
| 7 | 11 | -6 | sea | 100000000 | 54300 | 70000 |
| 7 | 11 | -6 |  | 10000000 | 4000 | 7800 |
| 7 | 11 | -6 |  | 1000000 | 1500 | 2000 |
| 7 | 11 | -6 |  | 100000 | 10 | 30 |
| 7 | 11 | -6 |  | 10000 | 0 | 0 |
| 7 | 22 | -31 | land | 100000000 | 45000 | 50000 |
| 7 | 22 | -31 |  | 10000000 | 12000 | 18000 |
| 7 | 22 | -31 |  | 1000000 | 8000 | 10500 |
| 7 | 22 | -31 |  | 100000 | 500 | 850 |
| 7 | 22 | -31 |  | 10000 | 40 | 70 |
| 7 | 41 | -59 | sea | 100000000 | 24000 | 25000 |
| 7 | 41 | -59 |  | 10000000 | 0 | 0 |
| 7 | 41 | -59 |  | 1000000 | 0 | 0 |
| 7 | 41 | -59 |  | 100000 | 0 | 0 |
| 7 | 41 | -59 |  | 10000 | 0 | 0 |
| 8 | 78 | -2 | sea | 100000000 | 70000 | 100000 |
| 8 | 78 | -2 |  | 10000000 | 1000 | 2500 |
| 8 | 78 | -2 |  | 1000000 | 0 | 0 |
| 8 | 78 | -2 |  | 100000 | 0 | 0 |
| 8 | 78 | -2 |  | 10000 | 0 | 0 |
| 8 | 81 | -19 | sea | 100000000 | 55000 | 80000 |
| 8 | 81 | -19 |  | 10000000 | 0 | 0 |
| 8 | 81 | -19 |  | 1000000 | 0 | 0 |
| 8 | 81 | -19 |  | 100000 | 0 | 0 |
| 8 | 81 | -19 |  | 10000 | 0 | 0 |
| 8 | 101 | -28 | sea | 100000000 | 60000 | 100000 |
| 8 | 101 | -28 |  | 10000000 | 50 | 500 |
| 8 | 101 | -28 |  | 1000000 | 0 | 0 |
| 8 | 101 | -28 |  | 100000 | 0 | 0 |
| 8 | 101 | -28 |  | 10000 | 0 | 0 |
| 8 | 74 | -45 | sea | 100000000 | 26696 | 40000 |
| 8 | 74 | -45 |  | 10000000 | 5 | 250 |
| 8 | 74 | -45 |  | 1000000 | 0 | 0 |
| 8 | 74 | -45 |  | 100000 | 0 | 0 |
| 8 | 74 | -45 |  | 10000 | 0 | 0 |
| 8 | 96 | -50 | sea | 100000000 | 20604 | 32945 |
| 8 | 96 | -50 |  | 10000000 | 0 | 0 |
| 8 | 96 | -50 |  | 1000000 | 0 | 0 |
| 8 | 96 | -50 |  | 100000 | 0 | 0 |
| 8 | 96 | -50 |  | 10000 | 0 | 0 |
| 9 | 129 | -9 | sea | 100000000 | 70000 | 100000 |
| 9 | 129 | -9 |  | 10000000 | 13000 | 22000 |
| 9 | 129 | -9 |  | 1000000 | 400 | 1000 |
| 9 | 129 | -9 |  | 100000 | 30 | 100 |
| 9 | 129 | -9 |  | 10000 | 0 | 0 |
| 9 | 123 | -13 | sea | 100000000 | 70000 | 100000 |
| 9 | 123 | -13 |  | 10000000 | 2000 | 3000 |
| 9 | 123 | -13 |  | 1000000 | 700 | 1500 |
| 9 | 123 | -13 |  | 100000 | 20 | 100 |
| 9 | 123 | -13 |  | 10000 | 0 | 3 |
| 9 | 148 | -15 | sea | 100000000 | 52000 | 75000 |
| 9 | 148 | -15 |  | 10000000 | 4600 | 7000 |
| 9 | 148 | -15 |  | 1000000 | 100 | 200 |
| 9 | 148 | -15 |  | 100000 | 0 | 3 |
| 9 | 148 | -15 |  | 10000 | 0 | 0 |
| 9 | 135 | -21 | land | 100000000 | 49606 | 80777 |
| 9 | 135 | -21 |  | 10000000 | 3420 | 4200 |
| 9 | 135 | -21 |  | 1000000 | 300 | 430 |
| 9 | 135 | -21 |  | 100000 | 20 | 75 |
| 9 | 135 | -21 |  | 10000 | 2 | 10 |
| 9 | 121 | -46 | sea | 100000000 | 30000 | 38000 |
| 9 | 121 | -46 |  | 10000000 | 500 | 1500 |
| 9 | 121 | -46 |  | 1000000 | 0 | 0 |
| 9 | 121 | -46 |  | 100000 | 0 | 0 |
| 9 | 121 | -46 |  | 10000 | 0 | 0 |
| 10 | -35 | -25 | sea | 100000000 | 59000 | 90000 |
| 10 | -35 | -25 |  | 10000000 | 1000 | 4000 |
| 10 | -35 | -25 |  | 1000000 | 0 | 0 |
| 10 | -35 | -25 |  | 100000 | 0 | 0 |
| 10 | -35 | -25 |  | 10000 | 0 | 0 |
| 10 | -57 | -29 | land | 100000000 | 60000 | 94000 |
| 10 | -57 | -29 |  | 10000000 | 6000 | 8000 |
| 10 | -57 | -29 |  | 1000000 | 120 | 670 |
| 10 | -57 | -29 |  | 100000 | 10 | 100 |
| 10 | -57 | -29 |  | 10000 | 0 | 5 |
| 10 | -43 | -49 | sea | 100000000 | 24000 | 40000 |
| 10 | -43 | -49 |  | 10000000 | 12 | 18 |
| 10 | -43 | -49 |  | 1000000 | 0 | 0 |
| 10 | -43 | -49 |  | 100000 | 0 | 0 |
| 10 | -43 | -49 |  | 10000 | 0 | 0 |
| 10 | -11 | -61 | sea | 100000000 | 20000 | 25000 |
| 10 | -11 | -61 |  | 10000000 | 0 | 0 |
| 10 | -11 | -61 |  | 1000000 | 0 | 0 |
| 10 | -11 | -61 |  | 100000 | 0 | 0 |
| 10 | -11 | -61 |  | 10000 | 0 | 0 |
| 10 | -55 | -66 | sea | 100000000 | 7000 | 15000 |
| 10 | -55 | -66 |  | 10000000 | 0 | 3 |
| 10 | -55 | -66 |  | 1000000 | 0 | 1 |
| 10 | -55 | -66 |  | 100000 | 0 | 0 |
| 10 | -55 | -66 |  | 10000 | 0 | 0 |
| 11 | -116 | -12 | sea | 100000000 | 25000 | 40000 |
| 11 | -116 | -12 |  | 10000000 | 0 | 0 |
| 11 | -116 | -12 |  | 1000000 | 0 | 0 |
| 11 | -116 | -12 |  | 100000 | 0 | 0 |
| 11 | -116 | -12 |  | 10000 | 0 | 0 |
| 11 | -104 | -13 | sea | 100000000 | 35000 | 60000 |
| 11 | -104 | -13 |  | 10000000 | 0 | 0 |
| 11 | -104 | -13 |  | 1000000 | 0 | 0 |
| 11 | -104 | -13 |  | 100000 | 0 | 0 |
| 11 | -104 | -13 |  | 10000 | 0 | 0 |
| 11 | -74 | -33 | sea | 100000000 | 68000 | 100000 |
| 11 | -74 | -33 |  | 10000000 | 3000 | 5000 |
| 11 | -74 | -33 |  | 1000000 | 750 | 2000 |
| 11 | -74 | -33 |  | 100000 | 0 | 0 |
| 11 | -74 | -33 |  | 10000 | 0 | 0 |
| 11 | -120 | -37 | sea | 100000000 | 20000 | 30000 |
| 11 | -120 | -37 |  | 10000000 | 0 | 0 |
| 11 | -120 | -37 |  | 1000000 | 0 | 0 |
| 11 | -120 | -37 |  | 100000 | 0 | 0 |
| 11 | -120 | -37 |  | 10000 | 0 | 0 |
| 11 | -89 | -77 | land | 100000000 | 3960 | 5000 |
| 11 | -89 | -77 |  | 10000000 | 0 | 1 |
| 11 | -89 | -77 |  | 1000000 | 0 | 1 |
| 11 | -89 | -77 |  | 100000 | 0 | 0 |
| 11 | -89 | -77 |  | 10000 | 0 | 0 |
| 12 | -171 | -9 | sea | 100000000 | 18000 | 30000 |
| 12 | -171 | -9 |  | 10000000 | 100 | 350 |
| 12 | -171 | -9 |  | 1000000 | 5 | 20 |
| 12 | -171 | -9 |  | 100000 | 0 | 5 |
| 12 | -171 | -9 |  | 10000 | 0 | 1 |
| 12 | -159 | -22 | sea | 100000000 | 10000 | 15000 |
| 12 | -159 | -22 |  | 10000000 | 250 | 430 |
| 12 | -159 | -22 |  | 1000000 | 15 | 45 |
| 12 | -159 | -22 |  | 100000 | 3 | 30 |
| 12 | -159 | -22 |  | 10000 | 0 | 0 |
| 12 | -177 | -44 | sea | 100000000 | 13000 | 25000 |
| 12 | -177 | -44 |  | 10000000 | 2400 | 3000 |
| 12 | -177 | -44 |  | 1000000 | 40 | 52 |
| 12 | -177 | -44 |  | 100000 | 40 | 52 |
| 12 | -177 | -44 |  | 10000 | 30 | 50 |
| 12 | -149 | -45 | sea | 100000000 | 11000 | 15000 |
| 12 | -149 | -45 |  | 10000000 | 0 | 0 |
| 12 | -149 | -45 |  | 1000000 | 0 | 0 |
| 12 | -149 | -45 |  | 100000 | 0 | 0 |
| 12 | -149 | -45 |  | 10000 | 0 | 0 |
| 12 | -173 | -63 | sea | 100000000 | 7000 | 11600 |
| 12 | -173 | -63 |  | 10000000 | 0 | 1 |
| 12 | -173 | -63 |  | 1000000 | 0 | 0 |
| 12 | -173 | -63 |  | 100000 | 0 | 0 |
| 12 | -173 | -63 |  | 10000 | 0 | 0 |
|  |  |  |  |  |  |  |

**Highlights**

•Endemics–area relationships (EARs) are largely lacking for plants.

•Our new EAR method overcomes key [biases](https://www-sciencedirect-com.ezproxy.unibo.it/topics/agricultural-and-biological-sciences/bias) to [model](https://www-sciencedirect-com.ezproxy.unibo.it/topics/agricultural-and-biological-sciences/models) expected numbers of plant endemics.

•Our [global model](https://www-sciencedirect-com.ezproxy.unibo.it/topics/earth-and-planetary-sciences/global-model) for [vascular plants](https://www-sciencedirect-com.ezproxy.unibo.it/topics/earth-and-planetary-sciences/vascular-plant) is Endemics = 0.00001227·Area1.195 (area in km2).

•The model gives baseline [endemism](https://www-sciencedirect-com.ezproxy.unibo.it/topics/earth-and-planetary-sciences/endemism) for circular areas in the range 104–108 km2

•The average [area](https://www-sciencedirect-com.ezproxy.unibo.it/topics/agricultural-and-biological-sciences/area) needed for at least one endemic vascular [plant species](https://www-sciencedirect-com.ezproxy.unibo.it/topics/earth-and-planetary-sciences/plant-species) as 12,875 km2

•The total number of vascular plants estimated for the whole Earth is 312,243
